# Supplementary material for: Identifying social isolation themes in NVDRS text narratives using topic modeling and text-classification methods
Source: Research Square preprint supplement (doi:10.21203/rs.3.rs-7096343/v1), 2025-07-25
Supplement: Supplementary file 1 [file b438e3c5f001257b170b24fd.docx]

**Supplementary Materials**

***Topic modeling optimization***

Our application of the BERTopic model involved customizing several components to accommodate our specific research needs. For text vectorization, we utilized `CountVectorizer()`, including both unigrams and bigrams, to capture both words and short phrases. To enhance topic discrimination, we integrated `TfidfTransformer()` to apply TF-IDF weights to each token within the documents, which helped us identify unique words across the various suicide circumstance summaries.

Hyperparameters adjusted for topic modeling included the minimum cluster size, determined by the `HDBSCAN()` function from Scikit-Learn, which can  identify clusters of varying densities.[34](https://www.zotero.org/google-docs/?aALYSV) We also optimized the `n_components` and `min_dist` settings of the `UMAP()` function, which facilitated non-linear dimensionality reduction and ensured appropriate spacing between clusters.[35](https://www.zotero.org/google-docs/?byt9qv)  Model performance was then evaluated based on coherence scores calculated using the `get_coherence()` function from the Gensim package, providing a quantitative measure of the model's ability to produce interpretable topics.[36,37](https://www.zotero.org/google-docs/?bmuZD6) Of all models ran, our highest coherence (.946) was found with our model with the following hyperparameters: 57 minimum distance, 15 neighbors, 3 components, .01 min_dist. This resulted in a total of 64 topics, including one uncategorized topic.

***Supervised model optimization***

Hyperparameter optimization assessed best scores for models for logistic regression across regularization parameter (C ) values of : 0.01, 0.1, 1.0 ; random forest hyperparameter values included n_estimators (number of trees) of 100, 200, and 300, max depth of trees of none, 10, 20, and minimum samples split: 2, 5, 10; naive bayes values included alpha scores of .1, .5, and 1.0; RoBERTa values tested included max token length of 128, 512, batch size of 16, across 10 epochs, with learning rates of 5x10-6 and 1x10-5 .

**Supplemental Table 1: Social Isolation Event NVDRS Narrative Classifier Performance (100 samples)**

| **Bias Feature** | **Model** | **Accuracy** | **Precision (Positive)** | **Recall (Positive)** | **F1 (Positive)** | **Macro Precision** | **Macro Recall** | **Macro F1** |
| --- | --- | --- | --- | --- | --- | --- | --- | --- |
| **Social Isolation** | RoBERTA | .88 (.81, .93) | .88 (.81, .93) | 1 | .94 (.90, .97) | .44 ( .41, .48). | .50 (.50, .50) | .47 (.45, .48) |
| **Logistic Regression** | **.86 (.71,1)** | **.86 (.71,1)** | **1** | **.92 (.83,1)** | **.86 (.71,1)** | **1** | **.92 (.83,1)** |
| Naive Bayes | .86 (.71,1) | .86 (.71,1) | 1 | .92 (.83,1) | .86 (.71,1) | 1 | .92 (.83,1) |
| Random Forest | .86 (.71,1) | .86 (.71,1) | 1 | .92 (.83,1) | .86 (.71,1) | 1 | .92 (.83,1) |
| **Recent or Impending Divorce** | RoBERTA | .76 (.67, .82) | .76 (.68, .83) | 1 | .86 (.81, .91) | .38 (.34, .41) | .50 (.50, .50) | .43 (.41, .45) |
| **Logistic Regression** | **.66 (.66, .66)** | **.75 (.58, .92)** | **.75 (.58, .92)** | **1** | **.85 (.74, .96)** | **.75 (.58, .92)** | **1** |
| Naive Bayes | .66 (.66, .66) | .75 (.58, .92) | .75 (.58, .92) | 1 | .85 (.74, .96) | .75 (.58, .92) | 1 |
| Random Forest | .66 (.66, .66) | .75 (.58, .92) | .75 (.58, .92) | 1 | .85 (.74, .96) | .75 (.58, .92) | 1 |
| **Eviction or**  **Move** | RoBERTA | .68 (.60, .77) | .68 (.53, .82) | .53 (.39, .67) | .59 (.47, .71) | .68 (.59, .77) | .67 (.58, .75) | .67 (.57, .75) |
| Logistic Regression | .65 (.43, .83) | .66 (.2, 1) | .40 (.1, .70) | .48 (.14, .75) | .66 (.2, 1) | .40 (.1, .70) | .48 (.14, .75) |
| **Naive Bayes** | **.70 (.52,.87)** | **.79 (.25, 1)** | **.40 (.1,.75)** | **.52 (.15, .80)** | **.79 (.25, 1)** | **.40 (.1,  .75)** | **.52 (.15, .80)** |
| Random Forest | .52 (.35, .74) | 0 | 0 | 0 | 0 | 0 | 0 |
| **Break Up** | RoBERTA | .97 (.95, 1) | .97 (.94, 1) | 1 (1,1) | .99 (.97, 1) | .49 (.47, 1) | .50 (.50, 1) | .49 (.48, 1) |
| Logistic Regression | **1** | **.96 (.86, 1)** | **1** | **.98 (.93, 1)** | **.96 (.86, 1)** | **1** | **.98 (.93, 1)** |
| Naive Bayes | 1 | .96 (.86, 1) | 1 | .98 (.93, 1) | .96 (.86, 1) | 1 | .98 (.93, 1) |
| Random Forest | 1 | .96 (.86, 1) | 1 | .98 (.93, 1) | .96 (.86, 1) | 1 | .98 (.93, 1) |
| **Child Custody Loss** | RoBERTA | .46 (.36, .54) | .67 (0, 1) | .03 (0, .08) | .06 (0, .14) | .56 (.21, .76) | .51 (.48, .53) | .34 (.28, .41) |
| **Logistic Regression** | **.87 (.74, 1)** | **1 (1, 1)** | **.78 (.5, 1)** | **.87 (.67, 1)** | **1 (1,1)** | **.78 (.5 , 1)** | **.87 (.67, 1)** |
| Naive Bayes | .78 (.61, .91) | .90 (.67, 1) | .69 (.42, .93) | .77 (.56, .94) | .90 (.67, 1) | .69 (.42, .93) | .77 (.56, .94) |
| Random Forest | .61 (.39, .78) | .63 (.38, .85) | .77 (.5,  1) | .68 (.45, .86) | .63 (.38, .85) | .77 (.5, 1) | .68 (.45, .86) |
| **Pet loss** | RoBERTA | .70 (.61, .77) | 0 (0,0) | 0 (0,0) | 0 (0,0) | .35 (.61, .39) | .50 (.50,  .50) | .41 (.38, .44) |
| **Logistic Regression** | **.63 (.63, .63)** | **.78 (.61, .91)** | **.87 (0,1)** | **.28 (0, .67)** | **.41 (0, .80)** | **.87 (0, 1)** | **.28 (0, .67)** |
| Naive Bayes | .73 (.73, .73) | .69 (.52, .87) | 0 | 0 | 0 | 0 | 0 |
| Random Forest | .73 (.73, .73) | .69 (.52, .87) | 0 | 0 | 0 | 0 | 0 |

**Supplemental Table 2: Total rate of narrative classification predictions of each social isolation related topic across NVDRS law enforcement and coroner medical examiner narratives, percent predicted positive, and normalized total rate per 1000 suicides**

| Topic | Regex Matches, N | Refined Supervised Learning Predictions, N | Percentage Predicted Positive | Total rate per 1000 suicides |
| --- | --- | --- | --- | --- |
| Chronic Social Isolation | 1198 | 1198 | 1 | 3.905 |
| Recent or impending divorce | 15331 | 15311 | 0.998 | 49.977 |
| Recent eviction/move | 29977 | 9468 | 0.316 | 30.866 |
| Recent breakup | 12311 | 12311 | 1 | 40.126 |
| Child Custody Loss | 5326 | 1231 | 0.231 | 4.012 |
